# Supplementary material
Source: PubMed Central journal article supplement (PMC5103304)
Supplement: NIHMS826464-supplement-Supplemental.pdf [file NIHMS826464-supplement-Supplemental.pdf]

## Supporting Information

# Image-Guided Radiotherapy Targets Macromolecules through Altering the Tumor Microenvironment

### Authors:

Oliver K. Appelbe,<sup>†,‡</sup> Qingbei Zhang,<sup>†,‡</sup> Charles A. Pelizzari,<sup>§</sup> Ralph R.

Weichselbaum,<sup>†,§</sup> and Stephen J. Kron\*<sup>†,‡</sup>

### Affiliations:

<sup>†</sup> Ludwig Center for Metastasis Research, The University of Chicago, 5758 South Maryland Avenue, MC 9006, Chicago, IL 60637, United States

<sup>‡</sup> Department of Molecular Genetics and Cellular Biology, The University of Chicago, 929 East 57<sup>th</sup> Street, GCIS W519, Chicago, IL 60637, United States

<sup>§</sup> Department of Radiation and Cellular Oncology, The University of Chicago, 5758 South Maryland Avenue, MC 9006, Chicago, IL 60637, United States

---

\* Stephen J. Kron, The University of Chicago, GCIS W522A, 929 East 57<sup>th</sup> Street, Chicago, IL 60637, phone - (773) 834-0250, fax - (773) 702-3611, [skron@uchicago.edu](mailto:skron@uchicago.edu)

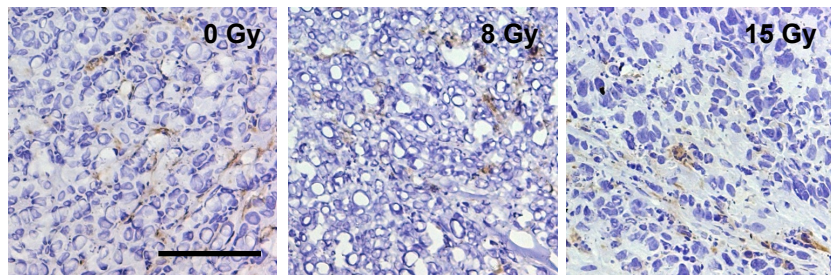

**Supplementary Figure 1.** Radiation and perivascular apoptosis. Immunohistochemistry of tissue sections of MCF7<sup>GFP-IBD</sup> xenograft tumors excised 3 days after irradiation to detect cleaved caspase 3 (brown) displays no marked increase in apoptosis. Scale bar = 200  $\mu\text{m}$ .

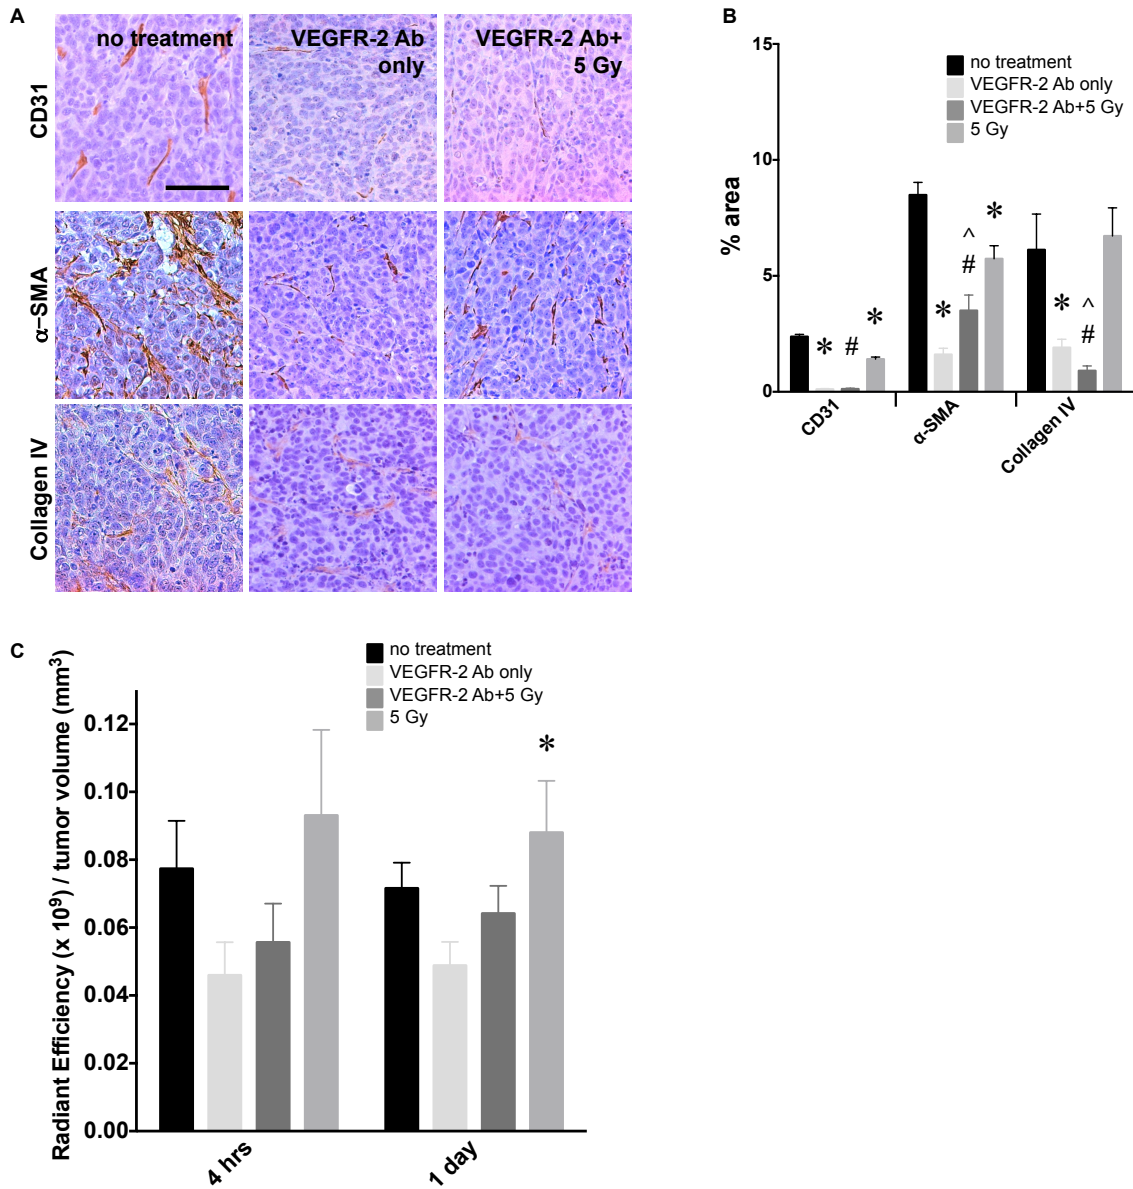

**Supplementary Figure 2.** VEGFR-2 antibody depletes the tumor endothelium to the detriment of the radiation-enhanced delivery effect. (A) Immunohistochemistry of MCF7<sup>GFP-IBD</sup> xenograft tumors depicting the decrease in endothelium (CD31, brown), pericytes ( $\alpha$ -SMA, brown), and basal lamina (Collagen IV, brown) following treatment with VEGFR-2 antibody. Purple = hematoxylin, nuclei. Scale bar = 200  $\mu$ m. (B)

Relative quantification of IHC staining in MCF7<sup>GFP-IBD</sup> tumor sections. % area denotes the area of an image stained calculated using an ImageJ macro (details in methods). \*  $p \leq 0.05$  relative to no treatment control, #  $p \leq 0.05$  relative to 5 Gy only, ^  $p \leq 0.05$  relative to VEGFR-2 antibody only, n = 3. (C) MCF7<sup>GFP-IBD</sup> tumor retention of AngioSense, measured using IVIS fluorescence quantification, appears limited by the stromal changes apparent following VEGFR-2 treatment. AngioSense was administered 3 days after IR. \*  $p \leq 0.05$  relative to no treatment control at the same time point, n = 3.



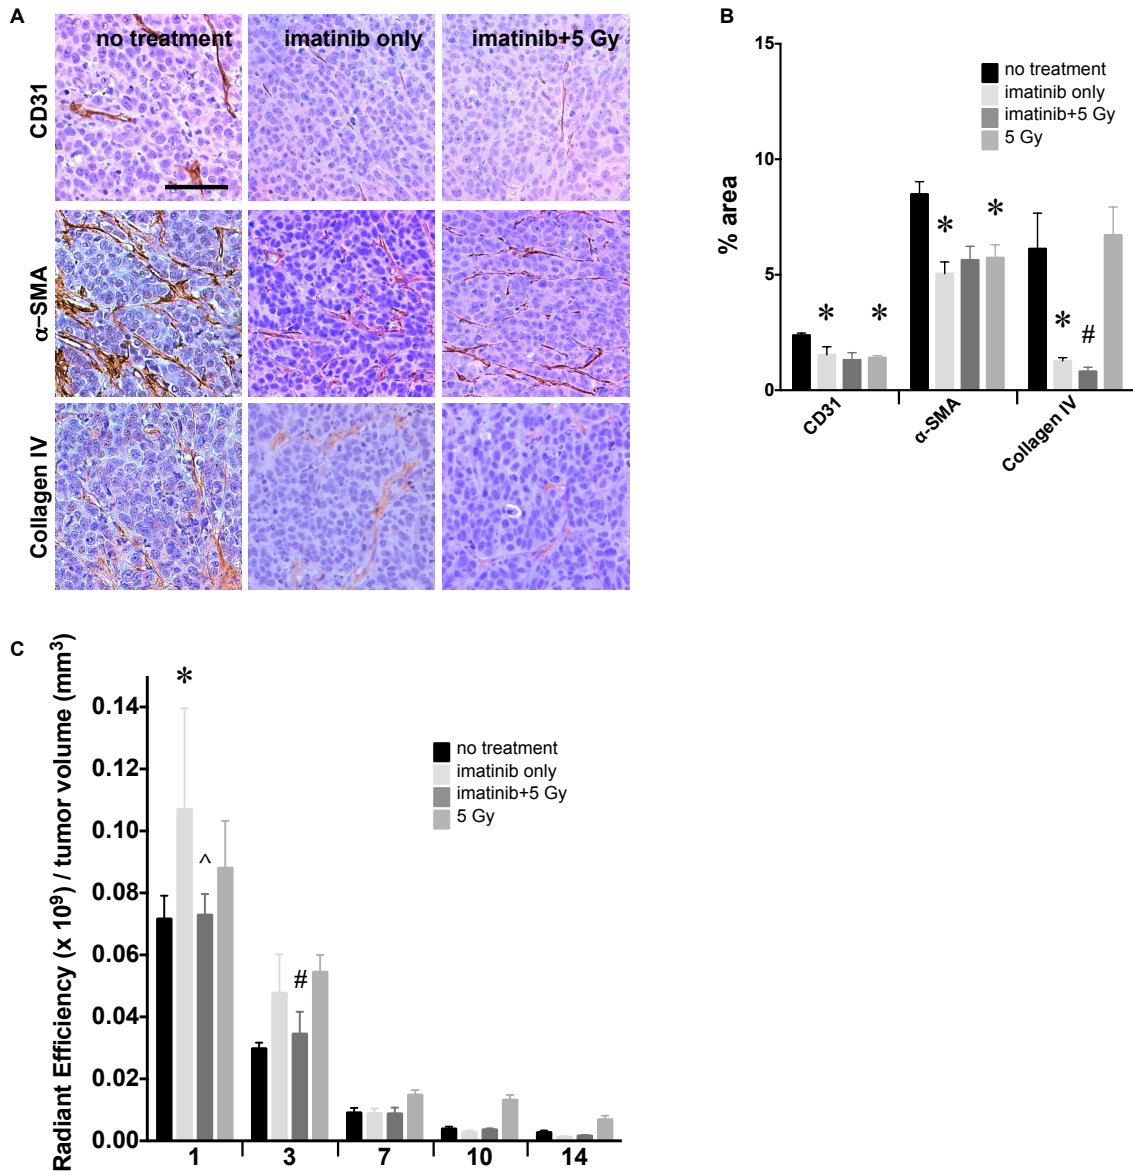

**Supplementary Figure 3.** Imatinib mesylate treatment leads to depletion of pericytes but does not act synergistically with IR to improve radiation-enhanced accumulation. (A) Immunohistochemistry of MCF7<sup>GFP-IBD</sup> xenograft tumors depicting the decrease in endothelium (CD31, brown), pericytes ( $\alpha$ -SMA, brown), and basal lamina (Collagen IV, brown) following imatinib mesylate treatment. Purple = hematoxylin, nuclei. Scale bar

= 200  $\mu\text{m}$ . **(B)** Relative quantification of IHC staining in MCF7<sup>GFP-IBD</sup> tumor sections. % area denotes the area of an image stained calculated using an ImageJ macro (details in methods). \*  $p \leq 0.05$  relative to no treatment control, #  $p \leq 0.05$  relative to 5 Gy only, n = 3. **(C)** MCF7<sup>GFP-IBD</sup> tumor retention of AngioSense, measured using IVIS fluorescence quantification, is increased following treatment with imatinib mesylate alone, but not in conjunction with 5 Gy IR. AngioSense was administered 3 days after IR. \*  $p \leq 0.05$  relative to no treatment control, #  $p \leq 0.05$  relative to 5 Gy only, ^  $p \leq 0.05$  relative to imatinib mesylate only, at the same time point, n = 5.

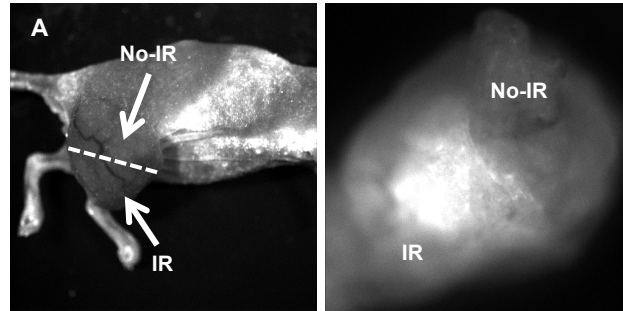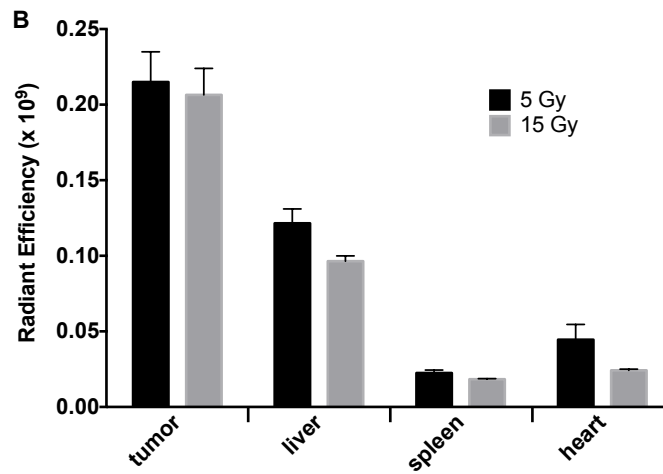

**Supplementary Figure 4.** Preferential retention of Doxil in irradiated areas of tumors compared to other tissues. (A) MCF7<sup>GFP-IBD</sup> tumors (prior to Doxil injection, left panel), half irradiated in order to use the unirradiated half as a control, were administered Doxil (10mg/kg) with radiation-enhanced delivery leading to greater drug distribution in the 15 Gy-treated half (right panel). (B) Tissue retention of Doxil 26 days after i.v. administration in BALB/c female mice with TUBO hindlimb tumors. Doxil (10 mg/kg) was administered three days following tumor irradiation. n = 2 for each data set.
